# Supplementary material
Source: PubMed Central journal article supplement (PMC6413793)

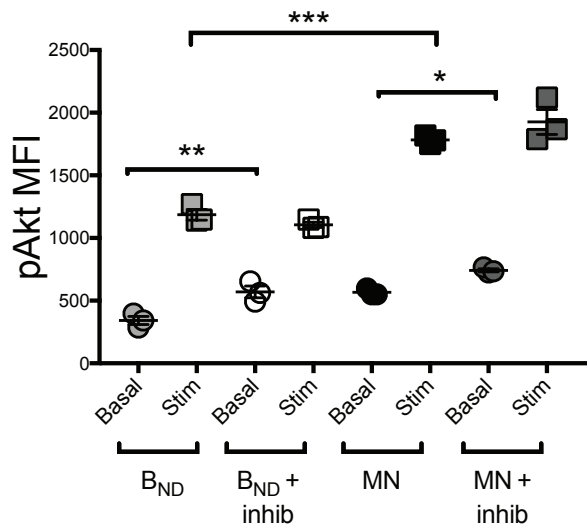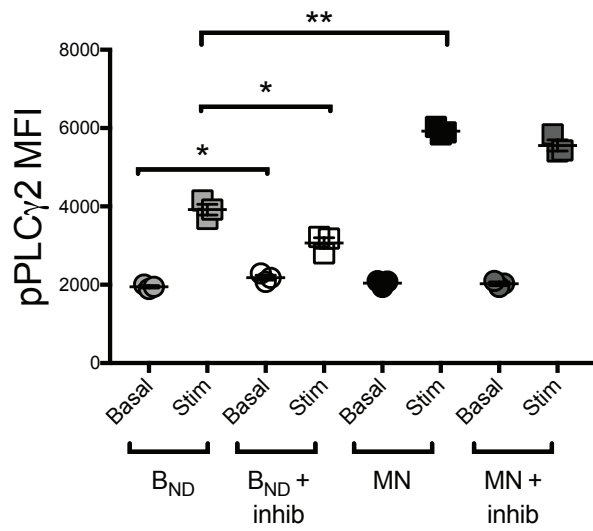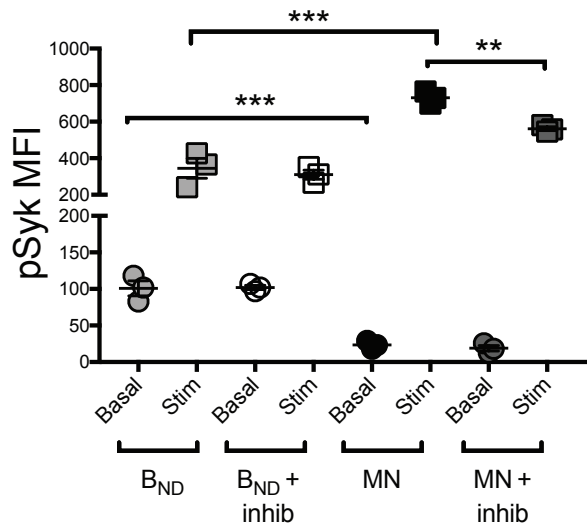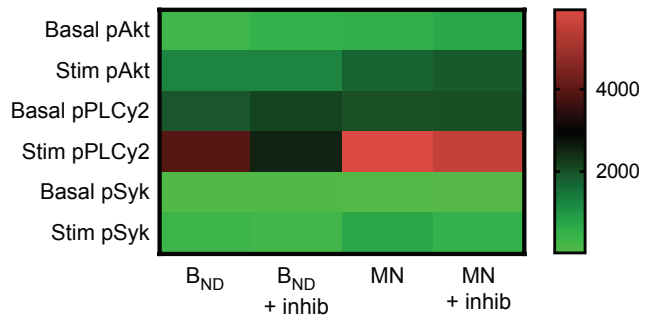

Supplement: jciinsight-4-123384-s103.pdf [file jciinsight-4-123384-s103.pdf]
